# Supplementary material
Source: HighWire-hosted journal article supplement (http://www.cmaj.ca/highwire/filestream/58411/field_highwire_adjunct_files/2/evid-ioannidis-appendix_3_online_only.pdf)
Supplement: evid-ioannidis-appendix_3_online_only.pdf [file evid-ioannidis-appendix_3_online_only.pdf]

**Appendix 3: Differences in absolute risks of harms in randomized trials and in each of the corresponding nonrandomized studies**

| Harm (intervention)                                                           | Randomized trials |                             | Nonrandomized studies |                              |
|-------------------------------------------------------------------------------|-------------------|-----------------------------|-----------------------|------------------------------|
|                                                                               | Topic no.*        | Risk difference (95% CI), % | Topic no.*            | Risk difference (95% CI), %  |
| Encephalopathy (acellular v. whole-cell pertussis vaccine)                    | 1                 | 0.00 (-0.01 to 0.01)        | 1a                    | -0.0001 (-0.0001 to 0.0000)  |
| Convulsions (acellular v. whole-cell pertussis vaccine)                       | 2                 | -0.04 (-0.07 to -0.01)      | 2a                    | -0.0010 (-0.0012 to -0.0008) |
|                                                                               |                   |                             | 2b                    | -0.0011 (-0.0013 to -0.0008) |
| Hepatitis-related death (isoniazid chemoprophylaxis)                          | 9                 | 0.02 (0.00 to 0.05)         | 9a                    | 0.00 (0.00 to 0.03)          |
|                                                                               |                   |                             | 9b                    | 0.0011 (0.0000 to 0.0020)    |
| Visceral or vascular injury (laparoscopy v. open surgery for inguinal hernia) | 10                | 0.02 (-0.28 to 0.31)        | 10a                   | 1.22 (-0.25 to 2.69)         |
| Wound infection (laparoscopy v. open surgery for appendicitis)                | 11                | -2.96 (-4.26 to -1.66)      | 11a                   | -1.32 (-2.20 to -0.44)       |
|                                                                               |                   |                             | 11b                   | -2.80 (-3.00 to -2.60)       |
| Spontaneous miscarriage (folate supplementation)                              | 12                | 1.13 (-0.20 to 2.47)        | 12a                   | 0.30 (-1.10 to 1.70)         |
|                                                                               |                   |                             | 12b                   | 1.30 (-0.30 to 2.90)         |
| Multiple gestation (folate supplementation)                                   | 13                | 0.49 (-0.11 to 1.08)        | 13a                   | -0.06 (-0.12 to 0.00)        |
|                                                                               |                   |                             | 13b                   | -0.15 (-0.97 to 0.67)        |
|                                                                               |                   |                             | 13c                   | 1.30 (0.65 to 1.95)          |
| Major bleed (platelet glycoprotein IIB/IIIa blocker therapy in PCI)           | 14                | 0.96 (0.09 to 1.83)         | 14a                   | 0.25 (-0.02 to 0.52)         |

Note: CI = confidence interval, PCI = percutaneous coronary intervention.

\*The topic numbers correspond to those listed in Table 1 of the print article (available at [www.cmaj.ca/cgi/content/full/174/5/635](http://www.cmaj.ca/cgi/content/full/174/5/635)).
